# Supplementary material
Source: Springer Nature journal article supplement (https://www.springermedizin.de/resource/supplementary/12889_2012_4810_MOESM1_ESM.pdf/9490620)

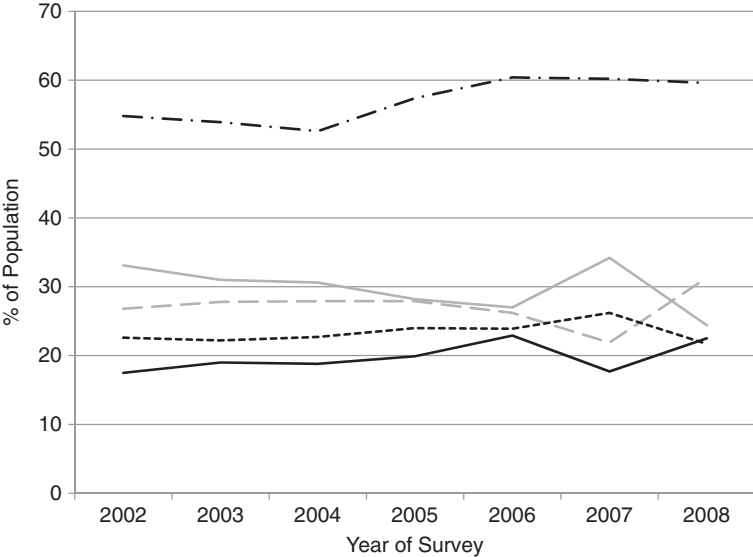

— · — Overweight or Obese

— — S-MVPA/LST

— I-MVPA/LST

— S-MVPA/HST

Supplement: MOESM1 [file 9490620]
